# Supplementary material for: The Town as Agrarian Dissipative Structure: Cash Crops in the Medieval Kingdom of Galicia
Source: Preprints.org preprint supplement (doi:10.20944/preprints202201.0284.v1), 2022-01-19
Supplement: Supplementary file 1 [file supplementary]

## Sheet: Export Summary
	This document was exported from Numbers. Each table was converted to an Excel worksheet. All other objects on each Numbers sheet were placed on separate worksheets. Please be aware that formula calculations may differ in Excel.
	Numbers Sheet Name	Numbers Table Name	Excel Worksheet Name
	Cash crops-TOTAL
		Tabla 1	Cash crops-TOTAL - Tabla 1
	Table 1 Cash Crops
		Tabla 1	Table 1 Cash Crops - Tabla 1
	Table S1-Waterlogged remains
		Tabla 1	Table S1-Waterlogged remains -
	Table S2-Charred remains
		Tabla 1	Table S2-Charred remains - Tabl

## Sheet: Table S1-Waterlogged remains - 
Taxa			Waterlogged
			Banco de España	O Bordel	Ponte do Burgo		Arcebispo Malvar						Total remains
Group	Scientific Name	Plant Part	24E	E-143-1C	15B-E4	15B-J7	1404	1216	1218	1219	1220	1221
Cereal	Avena sp.	Seed	1			1							2
	Panicum miliaceum	Seed			1				1				2
		Palea/upper lemma			509	91	4	2	1	2	2		611
		Palea/upper lemma still attached	24	32	155	25	2		2	2			242
		Palea/lemma fragments		1743744									1743744
	Panicum/Setaria	Palea/lemma fragments	262240		18046								280286
	Secale cereale	Rachis 4 internodes			1								1
		Rachis 3 internodes			2								2
		Rachis 1 internodes			1								1
	Setaria italica	Palea	2										2
Garden	Brassica rapa	Testa				1799							1799
	Cucumis melo	Seed	3	6					1				10
		Seed fragment					1						1
	Spinacia oleracea	Fruit			1								1
Fruits	Castanea sativa	Pericarp fragment	3		5	9	24	7	18	6	1	2	75
	Ficus carica	Infructescence	137	2724	54	13	93	157	327	283	66	32	3886
	Juglans regia	Endocarp fragment					15	23	33	23	2		96
	Malus domestica	Seed	3	3									6
	Mespilus germanica	Endocarp		19									19
	Prunus avium	Endocarp	364	2			1						367
		Endocarp fragment	28		1		1		6	2	1		39
	Prunus domestica	Endocarp fragment							1	1			2
	Prunus persica	Endocarp fragment			6				3				9
	Prunus sp.	Endocarp fragment			3								3
	Vitis vinifera	Seed		6	17	8	13	13	8	5		1	71
		Seed fragment			3	2	2	1	2		1		11
Ruderals/Weeds/Wild	Atriplex/Chenopodium	Seed			1			2			1	1	5
	Carex sp.	Achene			1								1
	Centaurium pulchellum	Flower			1								1
	Centaurium pulchellum	Seed			7								7
	Cerastium sp.	Seed			1								1
	Chenopodium album	Seed	2	38	4			2	5	2			53
	Chenopodium glaucum	Seed						1	2	1			4
	Glebionis segetum	Seed			1		1	2	5	3			12
	Glebionis segetum	Seed fragment								1			1
	Juncus sp.	Seed	1										1
	Medicago sp	Fruit fragment						2					2
	Ornithopus sp	Lomento fragment				1			1				2
	Pinus sp	Seed			1								1
	Polygonum lapathifolium	Seed		5			1	2	2				10
		Seed fragment	1					3	6				10
	Polygonum persicaria	Seed		4			1		2	5			12
		Seed fragment							1	1			2
	Polygonum sp.	Seed	1										1
	Portulaca oleracea	Seed	1				1						2
	Cf Pteridium aquilinum	Leaf	2										2
		Stem	4										4
	Raphanus raphanistrum	Silicua				1			4				5
		Silicua fragment				1			1	3	1		6
	Rubus fruticosus	Seed			63	5	14	4	12	12	1	1	112
		Seed fragment			2					3			5
		Spine								1			1
	Rumex sp	Seed			1		1			1			3
	Sambucus nigra	Seed								1			1
	Silene gallica	Seed		4	1			1	5	1		1	13
	Solanum sp	Seed			1						2		3
	Solanum nigrum	Seed			1								1
	Stellaria media	Seed	1	4	4	1	1			1			12
	Trifolium sp	Seed					1						1
	Ulex sp.	Stem	1										1
	Urtica sp	Seed										1	1
	Urtica urens	Seed	20	2	32								54
	Verbena officinalis	Seed			1	1							2
	Amaranthaceae	Seed	3										3
	Fabaceae	Seed										1	1
	Caryophillaceae	Seed	1										1
		Seed fragment	1										1
	Poaceae	Stem fragment		3									3
		Rachis 4 internodes			1								1
	Polygonaceae	Seed						1					1
Undetermined	Undetermined	Seed	2	1	2	1	20	1	11	19	6	2	65
		Seed fragment			1	3			1	1			6
	Undeterminable	Seed	2										2
Total por sample			262848	1746597	18932	1962	197	224	461	380	84	42	2031727
Total per site			262848	1746597	20894		1388

## Sheet: Table S2-Charred remains - Tabl
Taxa			Charred
			O Bordel	Arcebispo Malvar				Total remains
Group	Scientific Name	Plant Part	E-66C	1216	1218	1219	1220
Cereal	Triticum aestivum/durum*	Seed	1					1
Ruderals/Weeds/Wild	Lolium perenne/rigidum	Seed		1	1		1	3
	Fabaceae	Seed				1		1
Undetermined	Undetermined	Seed		5				5
Total por sample			1	6	1	1	1	10
Total per site			1	9
